# Supplementary material for: Effect of chemical interaction between oleic acid and L-Arginine on oral perception, as a function of polymorphisms of CD36 and OBPIIa and genetic ability to taste 6-n-propylthiouracil
Source: PubMed Central journal article supplement (PMC5864069; doi:10.1371/journal.pone.0194953), 2018-03-22
Supplement: pone.0194953.s001.pdf [file pone.0194953.s001.pdf]

**S1 Table.** Ratings of perceived taste intensity in response to three concentrations of PROP and NaCl in the taster groups.

|                      | <b>Super-tasters</b> | <b>Medium-tasters</b> | <b>Non-tasters</b> |
|----------------------|----------------------|-----------------------|--------------------|
|                      | <b>(n = 10)</b>      | <b>(n = 19)</b>       | <b>(n = 17)</b>    |
| <b>PROP (mmol/L)</b> |                      |                       |                    |
| 0.032                | 10.72 ± 2.38         | 4.38 ± 1.31           | 0.83 ± 0.41        |
| 0.32                 | 54.83 ± 6.16 *       | 37.07 ± 3.14          | 4.74 ± 1.06 *      |
| 3.2                  | 92.00 ± 2.90 *       | 60.31 ± 3.84          | 25.11 ± .69 *      |
| <b>NaCl (mol/L)</b>  |                      |                       |                    |
| 0.01                 | 2.04 ± 0.74          | 7.56 ± 2.01           | 1.96 ± 0.62        |
| 0.1                  | 25.45 ± 6.09 *       | 29.96 ± 4.06          | 23.76 ± 3.43 *     |
| 1                    | 63.27 ± 7.05 *       | 63.35 ± 5.06          | 53.90 ± 4.38 *     |

Values are means ± SEM. n = 46. Three-way ANOVA was used to compare PROP bitterness intensity ratings with NaCl saltiness intensity ratings across groups ( $F_{(4,258)} = 5.199$ ;  $p = 0.00048$ ). \* Significant difference between PROP and the corresponding NaCl concentration ( $p < 0.0015$ ; Newman Keuls test).
