# Supplementary material for: Effect of chemical interaction between oleic acid and L-Arginine on oral perception, as a function of polymorphisms of CD36 and OBPIIa and genetic ability to taste 6-n-propylthiouracil
Source: PubMed Central journal article supplement (PMC5864069; doi:10.1371/journal.pone.0194953), 2018-03-22
Supplement: pone.0194953.s002.pdf [file pone.0194953.s002.pdf]

## S1 File. Quantum-Mechanical Calculations

Theoretical calculations were carried out at DFT level [1] on oleic acid, the oleate anion, L-Arginine (L-Arg), the protonated form of L-Arg (L-ArgH<sup>+</sup>), and the hypothetical adduct oleic acid·L-Arg. All calculations adopted the mPW1PW hybrid functional reported by Adamo and Barone [2], paralleled by split-valence basis sets, including polarization functions, by Schäfer and coworkers [3] in the newer formulations proposed by Weigend (def2svp) [4,5]. The metric parameters for all the compounds were calculated at their fully relaxed geometries, evaluated by means of analytically calculated gradients, by means of the Berny algorithm using GEDIIS [6].

Atomic charges were calculated at Natural Bond Orbital level (NBO) [7] at the optimized geometries. Calculations were also carried out in the presence of water ( $\epsilon_r = 78.355$ ) and n-pentadecane ( $\epsilon_r = 2.033$ ) to mimic the differently polar environment within and outside oleic acid vesicles (Tables S2-S16). Solvation was implicitly taken into account by the Polarizable Continuum Model in its Integral Equation Formalism variant (IEF-PCM) Self-Consistent Reaction Field (SCRF) [8]. The adduct formation energy ( $\Delta E_{\text{add}}$ ) was evaluated by considering the total electronic energies of oleic acid ( $E_{\text{oleic acid}}$ ), L-Arg ( $E_{\text{L-Arg}}$ ) and the adduct ( $E_{\text{oleic acid}\cdot\text{L-Arg}}$ ), according to the relation  $\Delta E_{\text{add}} = E_{\text{oleic acid}\cdot\text{L-Arg}} - E_{\text{oleic acid}} - E_{\text{L-Arg}}$ . A Second-Order Perturbation Theory analysis of the Fock matrix in NBO basis (SOPT) was carried out to evaluate the contributions of the hydrogen bonds to the adduct formation in oleic acid·L-Arg.

All calculations were performed with the Gaussian 09 suite of programs [9] on a IBM x3755 server equipped with four 12-core AMD Opteron processors and 64 Gb of RAM and running a 64 bit version of a Linux operating system. The programs Gaussview 5.0.9 [10] and Molden 5.7 [11] were used to investigate the charge distributions and molecular orbital shapes.

## References

1. Koch W, Holthausen MC A Chemist's Guide to Density Functional Theory; ed n, editor. Wiley-VCH, Weinheim, Germany 2002.
2. Adamo C, Barone V Exchange functionals with improved long-range behavior and adiabatic connection methods without adjustable parameters: The mPW and mPW1PW models. *J Chem Phys.* 1998; 108: 664-675.
3. Schäfer A, Horn H, Ahlrichs R Fully optimized contracted Gaussian basis sets for atoms Li to Kr. *J Chem Phys.* 1992; 97: 2571-2577.
4. Weigend F Accurate Coulomb-fitting basis sets for H to Rn. *Phys Chem Chem Phys.* 2006; 8: 1057-1065.
5. Weigend F, Ahlrichs R Balanced basis sets of split valence, triple zeta valence and quadruple zeta valence quality for H to Rn: Design and assessment of accuracy. *Phys Chem Chem Phys.* 2005; 7: 3297-3305.
6. Li X, Frisch MJ Energy-Represented Direct Inversion in the Iterative Subspace within a Hybrid Geometry Optimization Method. *Journal of Chemical Theory and Computation.* 2006; 2: 835-839.
7. Reed AE, Weinstock RB, Weinhold F Natural population analysis. *J Chem Phys.* 1985; 83: 735-746.
8. Tomasi J, Mennucci B, Cammi R Quantum Mechanical Continuum Solvation Models. *Chem Rev.* 2005; 105: 2999-3094.
9. Frisch MJ, Trucks GW, Schlegel HB, Scuseria GE, Robb MA, et al. Gaussian, Inc., Wallingford CT, Gaussian 09, Revision A.02. 2009.
10. Dennington R, Keith T, Millam J Semichem Inc., Shawnee Mission KS, GaussView, Version 5. 2009.
11. Schaftenaar G, Noordik JH Molden: a pre- and post-processing program for molecular and electronic structures\*. *J Comput Aided Mol Des.* 2000; 14: 123-134.

**Table S2.** Geometry of L-Arg in the orthogonal Cartesian coordinate format optimized in the gas phase at DFT level.

|   |          |          |          |
|---|----------|----------|----------|
| C | 1.02545  | -0.35289 | -0.03585 |
| C | -0.25437 | 0.42622  | 0.23008  |
| C | -1.50629 | -0.40994 | 0.01174  |
| N | -2.69777 | 0.36789  | 0.23735  |
| C | -3.95397 | -0.13835 | -0.05871 |
| N | -4.97057 | 0.71957  | 0.34307  |
| C | 2.29396  | 0.44971  | 0.23187  |
| C | 3.51518  | -0.44711 | 0.11840  |
| O | 4.64081  | 0.25585  | -0.07552 |
| N | 2.41039  | 1.58507  | -0.66184 |
| O | 3.51479  | -1.64179 | 0.24036  |
| N | -4.23601 | -1.24849 | -0.62409 |
| H | 2.29083  | 0.73695  | 1.31044  |
| H | 1.04917  | -0.68632 | -1.08516 |
| H | 1.05575  | -1.25937 | 0.58595  |
| H | -0.24726 | 0.80336  | 1.26922  |
| H | -0.31325 | 1.30844  | -0.42718 |
| H | -1.52187 | -0.77265 | -1.02872 |
| H | -1.46530 | -1.31237 | 0.65505  |
| H | -2.67837 | 0.95709  | 1.06153  |
| H | -3.41060 | -1.83240 | -0.73958 |
| H | -4.81154 | 1.69442  | 0.11417  |
| H | -5.87245 | 0.39133  | 0.01850  |
| H | 5.36728  | -0.38455 | -0.10942 |
| H | 1.72444  | 2.29423  | -0.42088 |
| H | 3.32637  | 2.01533  | -0.56936 |

**Table S3.** Geometry of L-Arg in the orthogonal Cartesian coordinate format optimized in water at IEF-PCM SCRF DFT level.

|   |          |          |          |
|---|----------|----------|----------|
| C | 1.02506  | -0.35072 | -0.04130 |
| C | -0.25568 | 0.42727  | 0.22431  |
| C | -1.50237 | -0.41818 | 0.01486  |
| N | -2.69853 | 0.35977  | 0.22606  |
| C | -3.94974 | -0.13414 | -0.06360 |
| N | -4.97366 | 0.69727  | 0.35429  |
| C | 2.29386  | 0.44810  | 0.24131  |
| C | 3.51627  | -0.44568 | 0.12099  |
| O | 4.62457  | 0.24086  | -0.15821 |
| N | 2.40574  | 1.60483  | -0.62993 |
| O | 3.51898  | -1.63726 | 0.30719  |
| N | -4.22204 | -1.24795 | -0.64751 |
| H | 2.28620  | 0.71864  | 1.32201  |
| H | 1.05014  | -0.68173 | -1.09227 |
| H | 1.04811  | -1.25796 | 0.57932  |
| H | -0.24597 | 0.81112  | 1.25929  |
| H | -0.31791 | 1.30506  | -0.43825 |
| H | -1.51048 | -0.80167 | -1.01860 |
| H | -1.46414 | -1.30550 | 0.67717  |
| H | -2.65907 | 1.03051  | 0.98435  |
| H | -3.37624 | -1.79863 | -0.78218 |
| H | -4.79536 | 1.69157  | 0.26907  |
| H | -5.87205 | 0.43162  | -0.03009 |
| H | 5.36756  | -0.38340 | -0.17582 |
| H | 1.69721  | 2.28776  | -0.37268 |
| H | 3.29873  | 2.06639  | -0.47295 |

**Table S4.** Geometry of L-Arg in the orthogonal Cartesian coordinate format optimized in the n-pentadecane at IEF-PCM SCRF DFT level.

|   |          |          |          |
|---|----------|----------|----------|
| C | 1.02453  | -0.34909 | -0.03999 |
| C | -0.25508 | 0.43202  | 0.22155  |
| C | -1.50496 | -0.40813 | 0.00762  |
| N | -2.69879 | 0.36938  | 0.22763  |
| C | -3.95315 | -0.13787 | -0.05802 |
| N | -4.97266 | 0.70947  | 0.35158  |
| C | 2.29436  | 0.44988  | 0.23294  |
| C | 3.51438  | -0.44895 | 0.12109  |
| O | 4.63775  | 0.24785  | -0.08621 |
| N | 2.41451  | 1.59006  | -0.65604 |
| O | 3.50987  | -1.64420 | 0.25543  |
| N | -4.23053 | -1.25232 | -0.62449 |
| H | 2.28873  | 0.73436  | 1.31156  |
| H | 1.04999  | -0.68472 | -1.08877 |
| H | 1.04942  | -1.25414 | 0.58391  |
| H | -0.24832 | 0.81458  | 1.25819  |
| H | -0.31353 | 1.31032  | -0.44086 |
| H | -1.51770 | -0.77932 | -1.02992 |
| H | -1.46440 | -1.30416 | 0.65904  |
| H | -2.67177 | 0.98643  | 1.03091  |
| H | -3.39594 | -1.82187 | -0.74778 |
| H | -4.80948 | 1.69268  | 0.16567  |
| H | -5.87512 | 0.39882  | 0.01209  |
| H | 5.36974  | -0.38742 | -0.11627 |
| H | 1.72417  | 2.29441  | -0.41123 |
| H | 3.32508  | 2.02759  | -0.54205 |

**Table S5.** Geometry of L-ArgH<sup>+</sup> in the orthogonal Cartesian coordinate format optimized in the gas phase at DFT level.

|   |          |          |          |
|---|----------|----------|----------|
| C | -1.07545 | 0.24568  | -0.19894 |
| C | -2.36296 | -0.43076 | 0.26472  |
| N | -2.75430 | -1.65494 | -0.41134 |
| C | 0.19630  | -0.51989 | 0.13831  |
| C | 1.43427  | 0.23619  | -0.31868 |
| N | 2.65582  | -0.47737 | 0.04378  |
| C | 3.87939  | 0.04171  | 0.03087  |
| N | 4.07671  | 1.28139  | -0.41658 |
| N | 4.91735  | -0.67461 | 0.47180  |
| C | -3.52731 | 0.58455  | 0.20267  |
| O | -3.37038 | 1.75453  | 0.41507  |
| O | -4.68940 | 0.02281  | -0.06828 |
| H | -2.27061 | -0.66632 | 1.33925  |
| H | -1.13723 | 0.41777  | -1.28751 |
| H | -1.05896 | 1.24300  | 0.26474  |
| H | 0.25646  | -0.68207 | 1.22729  |
| H | 0.17778  | -1.51597 | -0.33715 |
| H | 1.39920  | 0.38912  | -1.41097 |
| H | 1.44898  | 1.22697  | 0.16285  |
| H | 2.56547  | -1.46032 | 0.27146  |
| H | 4.78610  | -1.56928 | 0.92302  |
| H | 5.86686  | -0.34103 | 0.37906  |
| H | -2.54534 | -1.64391 | -1.40692 |
| H | -2.36961 | -2.50022 | -0.00373 |
| H | -4.48232 | -0.92423 | -0.23781 |
| H | 4.97668  | 1.73433  | -0.33610 |
| H | 3.33025  | 1.80730  | -0.84908 |

**Table S6.** Geometry of L-ArgH<sup>+</sup> in the orthogonal Cartesian coordinate format optimized in water at IEF-PCM SCRF DFT level.

|   |          |          |          |
|---|----------|----------|----------|
| C | -1.07435 | 0.34219  | -0.14955 |
| C | -2.34002 | -0.38232 | 0.29798  |
| N | -2.64218 | -1.63527 | -0.38209 |
| C | 0.19920  | -0.42645 | 0.17022  |
| C | 1.44464  | 0.30062  | -0.30864 |
| N | 2.63757  | -0.45142 | 0.04252  |
| C | 3.87933  | 0.02875  | 0.01965  |
| N | 4.11226  | 1.26210  | -0.42196 |
| N | 4.88950  | -0.72581 | 0.44973  |
| C | -3.57385 | 0.52895  | 0.18777  |
| O | -3.57705 | 1.69890  | 0.48507  |
| O | -4.64147 | -0.11940 | -0.23451 |
| H | -2.25635 | -0.59712 | 1.37676  |
| H | -1.13846 | 0.53812  | -1.23344 |
| H | -1.06038 | 1.32507  | 0.34297  |
| H | 0.27260  | -0.58867 | 1.25752  |
| H | 0.16198  | -1.42322 | -0.29882 |
| H | 1.39476  | 0.45330  | -1.40013 |
| H | 1.49628  | 1.29353  | 0.16498  |
| H | 2.52265  | -1.43103 | 0.27266  |
| H | 4.72228  | -1.61242 | 0.90451  |
| H | 5.84525  | -0.40351 | 0.39431  |
| H | -2.26210 | -1.66013 | -1.32659 |
| H | -2.29554 | -2.45072 | 0.11382  |
| H | -4.27721 | -1.03547 | -0.41880 |
| H | 5.04130  | 1.65848  | -0.39602 |
| H | 3.39134  | 1.80023  | -0.88021 |

**Table S7.** Geometry of L-ArgH<sup>+</sup> in the orthogonal Cartesian coordinate format optimized in n-pentadecane at IEF-PCM SCRF DFT level.

|   |          |          |          |
|---|----------|----------|----------|
| C | -1.07471 | 0.28599  | -0.19335 |
| C | -2.34961 | -0.40819 | 0.27655  |
| N | -2.71150 | -1.64793 | -0.39258 |
| C | 0.19839  | -0.48615 | 0.12037  |
| C | 1.44097  | 0.26138  | -0.33683 |
| N | 2.64775  | -0.46900 | 0.02798  |
| C | 3.87863  | 0.03604  | 0.03257  |
| N | 4.09634  | 1.27267  | -0.40931 |
| N | 4.89768  | -0.69592 | 0.48590  |
| C | -3.54450 | 0.56427  | 0.20444  |
| O | -3.44990 | 1.73797  | 0.44643  |
| O | -4.67519 | -0.03741 | -0.11302 |
| H | -2.25014 | -0.63222 | 1.35266  |
| H | -1.14879 | 0.47258  | -1.27860 |
| H | -1.05063 | 1.27547  | 0.28532  |
| H | 0.26727  | -0.66419 | 1.20619  |
| H | 0.16935  | -1.47568 | -0.36678 |
| H | 1.40678  | 0.41842  | -1.42865 |
| H | 1.46772  | 1.25156  | 0.14473  |
| H | 2.54650  | -1.45161 | 0.25108  |
| H | 4.74326  | -1.58032 | 0.94959  |
| H | 5.85042  | -0.36410 | 0.42942  |
| H | -2.45251 | -1.65029 | -1.37687 |
| H | -2.32150 | -2.47688 | 0.04356  |
| H | -4.40704 | -0.97430 | -0.28777 |
| H | 5.00532  | 1.70705  | -0.33049 |
| H | 3.36783  | 1.80120  | -0.86712 |



**Table S8.** Geometry of oleic acid in the orthogonal Cartesian coordinate format optimized in the gas phase at DFT level.

|   |          |          |          |
|---|----------|----------|----------|
| C | -1.80023 | 3.63176  | 0.48980  |
| H | -2.33979 | 4.23848  | 1.22685  |
| H | -0.46652 | 3.74900  | 0.46605  |
| H | -0.01379 | 4.44493  | 1.18253  |
| H | 0.50916  | 3.03265  | -0.41657 |
| H | 1.03143  | 3.77303  | -1.04925 |
| H | -0.01227 | 2.35665  | -1.11069 |
| H | 1.55663  | 2.24482  | 0.37309  |
| H | 2.07800  | 2.92645  | 1.06728  |
| H | 1.04446  | 1.50493  | 1.01113  |
| H | 2.58096  | 1.53914  | -0.50670 |
| H | 3.08444  | 2.28164  | -1.15004 |
| H | 2.05896  | 0.85337  | -1.19661 |
| H | 3.62901  | 0.76104  | 0.27990  |
| H | 4.15933  | 0.02768  | 0.93229  |
| H | 4.64396  | 1.44900  | -0.96081 |
| H | 5.14876  | 0.03959  | -0.59808 |
| H | 4.11754  | 0.76922  | -1.25372 |
| H | 5.69811  | -0.65571 | -1.27447 |
| H | 6.23408  | -0.72791 | 0.19192  |
| H | 6.69706  | -0.44141 | 0.85537  |
| H | 7.16206  | -0.03197 | 0.85809  |
| H | 7.64055  | -1.46106 | -0.69835 |
| H | 7.84047  | -0.72317 | -1.41688 |
| H | 7.31199  | -2.22442 | -1.30059 |
| H | 6.60654  | -2.16288 | 0.01089  |
| O | 8.95154  | -3.75488 | 1.18035  |
| O | 8.66843  | -2.59486 | 1.39841  |
| H | -2.07343 | -2.22982 | -0.42663 |
| H | -3.38158 | 2.75977  | -0.56434 |
| H | -3.46333 | 2.24492  | -1.13387 |
| H | -2.46333 | 3.40070  | -0.91325 |
| H | -4.75833 | 1.72843  | 0.43997  |
| H | -4.03606 | 1.06464  | 0.96902  |
| H | -3.41379 | 2.24415  | 1.23015  |
| H | -3.84333 | 0.86444  | -0.41105 |
| H | -5.12333 | 0.39644  | -1.21430 |
| H | -5.18737 | 1.56461  | -0.92393 |
| H | -5.74827 | -0.15376 | 0.37938  |
| H | -4.47501 | 0.34185  | 1.19144  |
| H | -6.15198 | -0.88307 | 0.88177  |
| H | -6.87118 | -0.97623 | -0.46760 |
| H | -5.93377 | -0.29920 | -0.96099 |
| H | -6.91538 | -1.46303 | -1.28656 |
| H | -7.46754 | -2.03478 | 0.51876  |
| H | -6.19606 | -1.54950 | 1.14287  |
| H | -8.88606 | -2.71667 | 0.80578  |
| H | -7.60764 | -2.85043 | -0.52545 |
| H | -7.33603 | -2.16752 | -1.00865 |
| H | -8.64333 | -3.33116 | -1.35098 |
| H | -9.23360 | -3.90818 | 0.26603  |
| H | -9.33697 | -3.45535 | 1.07726  |
| H | -7.93390 | -4.47419 | -0.37219 |
| H | -7.93390 | -4.63105 | 0.72800  |

**Table S9.** Geometry of oleic acid in the orthogonal Cartesian coordinate format optimized in water at IEF-PCM DFT level.

|   |            |          |          |
|---|------------|----------|----------|
| C | -1.786660  | 3.56802  | 0.47419  |
|   | -2.332888  | 4.182221 | 1.200075 |
| O | -0.4513888 | 3.68491  | 0.458875 |
| H | -0.003336  | 4.38701  | 1.17280  |
| H | 0.53094    | 2.96490  | -0.41401 |
| H | 1.05384    | 3.70473  | -1.04689 |
| H | 0.01562    | 2.28337  | -1.10736 |
| H | 1.58057    | 2.18661  | 0.38247  |
| H | 2.09332    | 2.87400  | 1.07744  |
| H | 1.07303    | 1.44067  | 1.01750  |
| H | 2.61399    | 1.49008  | -0.49408 |
| H | 3.10868    | 2.23807  | -1.13793 |
| H | 2.10009    | 0.79628  | -1.18199 |
| H | 3.67133    | 0.72673  | 0.29429  |
| H | 3.17693    | -0.01334 | 0.94729  |
| H | 4.19429    | 1.42329  | 0.97232  |
| H | 4.69370    | 0.01805  | -0.58536 |
| H | 5.18065    | 0.75332  | -1.24832 |
| H | 4.17615    | -0.69301 | -1.25179 |
| H | 5.76545    | -0.72358 | 0.20498  |
| H | 5.26241    | -1.44406 | 0.87501  |
| H | 6.29646    | -0.01274 | -0.85908 |
| H | 6.76699    | -1.44195 | -0.69514 |
| H | 7.20468    | -0.75055 | -1.42712 |
| H | 6.25167    | -2.22527 | -1.27771 |
| H | 7.92647    | -2.11249 | 0.00328  |
| H | 7.65344    | -3.72749 | 1.16213  |
| H | 6.72399    | -2.62432 | -1.39778 |
| H | 9.04825    | -2.14168 | -0.43334 |
| H | 8.64896    | 2.68828  | -0.57868 |
| H | 8.04245    | 2.12875  | -1.10662 |
| H | 8.32664    | 3.32644  | -0.97421 |
| H | 8.00334    | 1.71079  | 0.43491  |
| H | 8.33505    | 1.05471  | 1.02176  |
| H | 4.09530    | 2.27410  | 1.17463  |
| H | 4.43130    | 0.85967  | -0.41997 |
| H | 3.83524    | 0.30350  | -1.16457 |
| H | 5.09504    | -1.52163 | -1.00337 |
| H | 5.27534    | -0.12230 | 0.38184  |
| H | 5.87151    | -0.43366 | 1.12795  |
| H | 4.61223    | -0.78464 | -0.96364 |
| H | 6.21073    | -0.97165 | -0.47296 |
| H | 6.87603    | -0.30886 | -1.05330 |
| H | 5.61561    | -1.52538 | -1.22065 |
| H | 7.05461    | -1.95656 | 0.35659  |
| H | 7.64898    | -1.40341 | 1.07521  |
| H | 6.38910    | -2.62046 | -0.90624 |
| H | 7.98909    | -2.80512 | -0.52844 |
| H | 8.65289    | -2.14000 | -1.10698 |
| H | 7.39369    | -3.35563 | -1.27681 |
| H | 8.33466    | -3.78696 | 0.27617  |
| H | 9.46320    | -3.26399 | 1.00812  |
| H | 8.99560    | -4.38089 | -0.37151 |
| H | 8.19326    | -4.49041 | 0.83636  |

**Table S10.** Geometry of oleic acid in the orthogonal Cartesian coordinate format optimized in n-pentadecane at IEF-PCM DFT level.

|   |          |          |          |
|---|----------|----------|----------|
| C | -1.78852 | 3.58683  | 0.48435  |
| H | -2.33860 | 4.19169  | -1.21541 |
| O | -0.45508 | 3.71358  | 0.47035  |
| H | -0.01296 | 4.41281  | -1.19042 |
| H | 0.53265  | 3.00750  | -0.40731 |
| H | 1.06538  | 3.75791  | -1.01890 |
| H | 0.02092  | 2.34477  | -1.12130 |
| H | 1.56796  | 2.20466  | 0.38333  |
| H | 2.06972  | 2.87008  | -1.10703 |
| H | 1.04780  | 1.44326  | 0.98882  |
| H | 2.61583  | 1.53171  | -0.49449 |
| H | 3.13184  | 2.29795  | -1.09880 |
| H | 2.11327  | 0.86883  | -1.22033 |
| H | 3.64737  | 0.72948  | 0.28946  |
| H | 3.13061  | -0.03607 | 0.89427  |
| H | 4.15135  | 1.39227  | -1.01409 |
| H | 4.69449  | 0.05628  | -0.58896 |
| H | 5.17291  | 0.81957  | -1.19369 |
| H | 4.19523  | -0.61108 | -1.31239 |
| H | 5.72977  | -0.73979 | 0.19734  |
| H | 5.19274  | -1.49282 | 0.80426  |
| H | 6.23663  | -0.07368 | 0.91500  |
| H | 6.76531  | -1.41418 | -0.69785 |
| H | 7.24415  | -0.68420 | -1.36361 |
| H | 6.27121  | -2.15083 | -1.35514 |
| H | 7.88965  | -2.14165 | 0.01009  |
| H | 6.61272  | -2.80470 | -1.12964 |
| H | 9.02038  | -2.67730 | -1.32781 |
| H | 8.44633  | -2.17169 | -0.38780 |
| H | 3.03392  | 2.70657  | -0.57369 |
| H | 3.32485  | 2.15463  | -1.10396 |
| H | 3.48485  | 3.34322  | -0.96788 |
| H | 2.81995  | 1.71986  | 0.43331  |
| H | 4.09023  | 1.06960  | -1.02334 |
| H | 4.41233  | 2.27633  | -1.17596 |
| H | 3.81109  | 0.86215  | -0.42186 |
| H | 5.07961  | 0.31049  | -1.16576 |
| H | 5.25230  | -1.51857 | -1.00750 |
| H | 5.85292  | -0.12598 | 0.37832  |
| H | 4.58410  | -0.42570 | -1.12267 |
| H | 6.17663  | -0.78176 | 0.96348  |
| H | 6.84578  | -0.98423 | -0.47725 |
| H | 5.57607  | -0.32817 | -1.06120 |
| H | 7.01910  | -1.53454 | -1.22277 |
| H | 7.61566  | -1.97401 | 0.32527  |
| H | 6.34619  | -1.42405 | -1.06829 |
| H | 7.94047  | -2.63066 | -0.90610 |
| H | 8.60763  | -2.83243 | -0.53379 |
| H | 7.33896  | -2.17454 | -1.11553 |
| H | 8.77426  | -3.38015 | -1.27828 |
| H | 9.41544  | -3.81848 | 0.27226  |
| H | 9.42876  | -3.29896 | -1.00088 |
| H | 8.13567  | -4.41965 | -0.37532 |
| H |          | -4.51532 | 0.83667  |

**Table S11.** Geometry of oleate in the orthogonal Cartesian coordinate format optimized in the gas phase at DFT level.

|   |           |          |          |
|---|-----------|----------|----------|
| C | -1.62878  | 2.39118  | -0.02305 |
|   | -2.17516  | 3.34070  | -0.00065 |
| H | -0.29130  | 2.42671  | -0.03734 |
| H | 0.19984   | 3.40597  | -0.02439 |
| H | 0.60542   | 1.22175  | -0.07006 |
| H | 0.36274   | 0.60616  | -0.95612 |
| H | 0.37634   | 0.56886  | -0.79255 |
| H | 2.09496   | 1.54811  | -0.07474 |
| H | 2.32157   | 2.19226  | -0.94215 |
| H | 2.33534   | 2.15428  | -0.81598 |
| H | 2.99423   | 0.31925  | -0.10837 |
| H | 2.74672   | -0.28630 | -0.99875 |
| H | 2.76081   | -0.32404 | -0.75886 |
| H | 4.48559   | 0.63430  | -0.11331 |
| H | 4.48526   | 1.23492  | -0.77872 |
| H | 4.71788   | 1.28115  | -0.97806 |
| H | 5.38566   | -0.59617 | -0.15174 |
| H | 5.13969   | -1.19405 | -1.04913 |
| H | 5.14336   | -1.24671 | -0.70877 |
| H | 6.87617   | -0.27689 | -0.13450 |
| H | 7.14745   | 0.30083  | -0.76424 |
| H | 7.11494   | 0.38683  | -0.98534 |
| H | 7.79980   | -1.48185 | -0.16216 |
| H | 7.76275   | -2.01241 | -1.19819 |
| H | 7.47034   | -2.21479 | 0.59912  |
| H | 9.30093   | -1.14207 | 0.16143  |
| H | 9.47823   | -0.12484 | 0.86324  |
| O | 10.13198  | -1.94670 | -0.29513 |
| H | -2.45331  | 1.13407  | -0.03816 |
| H | -2.16280  | 0.48948  | -0.81158 |
| H | -2.20600  | 0.53915  | -0.93668 |
| H | -3.95692  | 1.37968  | 0.00574  |
| H | -4.20189  | 1.86548  | 0.90887  |
| H | -4.24496  | 2.01637  | -0.84897 |
| H | -4.78834  | 0.10372  | -0.01100 |
| H | -4.49538  | -0.53243 | -0.84264 |
| H | -4.53907  | -0.48085 | -0.91396 |
| H | -6.29260  | 0.34346  | 0.03327  |
| H | -6.26345  | 0.98004  | -0.82016 |
| H | -6.54219  | -0.92650 | 0.93720  |
| H | -7.12145  | -0.93533 | 0.01463  |
| H | -6.87143  | -1.31781 | -0.88945 |
| H | -6.82733  | -1.57215 | 0.86731  |
| H | -8.62613  | -0.69900 | 0.05966  |
| H | -8.92101  | -0.06158 | -0.79268 |
| H | -8.87718  | -0.11771 | 0.96456  |
| H | -9.45388  | -1.97897 | 0.03935  |
| H | -9.20140  | -2.55834 | -0.86516 |
| H | -9.15676  | -2.61522 | 0.89046  |
| H | -10.95557 | -1.73714 | 0.08535  |
| H | -11.29086 | -1.13485 | -0.77306 |
| H | -11.51925 | -2.68127 | 0.06747  |
| H | -11.24633 | -1.19502 | 0.99835  |

**Table S12.** Geometry of oleate in the orthogonal Cartesian coordinate format optimized in water at IEF-PCM DFT level.

|   |          |          |          |
|---|----------|----------|----------|
| C | -1.74573 | 3.58536  | 0.43566  |
| C | -2.29709 | 4.20235  | 1.15602  |
| C | -0.41109 | 3.70924  | 0.42248  |
| C | 0.03119  | 4.41867  | 1.13288  |
| C | 0.57780  | 2.98746  | -0.44131 |
| C | 1.11477  | 3.72801  | -1.06137 |
| C | 0.06729  | 2.31467  | -1.14671 |
| C | 1.61070  | 2.19522  | 0.36371  |
| C | 2.11042  | 2.87102  | 1.07938  |
| C | 1.08888  | 1.44127  | 0.97750  |
| C | 2.66116  | 1.50979  | -0.50148 |
| C | 3.17693  | 2.26886  | -1.11396 |
| C | 2.15933  | 0.83677  | -1.21873 |
| C | 3.69386  | 0.71891  | 0.29269  |
| C | 3.17806  | -0.04035 | 0.90665  |
| C | 4.19416  | 1.39219  | 1.01099  |
| C | 4.74777  | 0.03478  | -0.57030 |
| C | 5.26024  | 0.79488  | -1.18683 |
| C | 4.24700  | -0.63891 | -1.28854 |
| C | 5.78290  | -0.75248 | 0.22457  |
| C | 5.78749  | -1.51394 | 0.84139  |
| C | 6.28193  | -0.08460 | 0.94623  |
| C | 6.83816  | -1.43163 | -0.63079 |
| C | 7.36831  | -0.68793 | -1.25172 |
| C | 6.36395  | -2.11526 | -1.35724 |
| C | 7.91556  | -2.24551 | 0.12935  |
| C | 7.83082  | -2.79140 | 1.27683  |
| C | 8.78445  | -2.78987 | -0.58877 |
| C | -2.60132 | 2.69255  | -0.41049 |
| C | -1.99019 | 2.13002  | -1.13222 |
| C | -3.28278 | 3.32037  | -1.01266 |
| C | -3.44665 | 1.71742  | 0.41227  |
| C | -2.77723 | 1.07254  | 1.00676  |
| C | -4.04634 | 2.28435  | 1.14542  |
| C | -4.37089 | 0.85017  | -0.43361 |
| C | -3.77037 | 0.28846  | -1.17033 |
| C | -5.03797 | 1.50063  | -1.02609 |
| C | -5.21141 | -0.12677 | 0.37980  |
| C | -5.81078 | -0.43521 | 1.11746  |
| C | -4.54311 | -0.77664 | 0.97154  |
| C | -6.13769 | -0.99409 | -0.46443 |
| C | -6.80653 | -0.34398 | -1.05544 |
| C | -5.53818 | -1.55487 | -1.20295 |
| C | -6.97715 | -1.97250 | 0.34816  |
| C | -7.57650 | -1.41206 | 1.08735  |
| C | -6.30841 | -2.62323 | 0.93893  |
| C | -7.90449 | -2.83998 | -0.49551 |
| C | -8.57123 | -2.18809 | -1.08551 |
| C | -7.30412 | -3.39819 | -1.23413 |
| C | -8.73924 | -3.81458 | 0.32263  |
| H | -9.37882 | -3.28437 | 1.04508  |
| H | -9.39526 | -4.42281 | -0.31700 |
| H | -8.10070 | -4.50509 | 0.89500  |

**Table S13.** Geometry of oleic acid in the orthogonal Cartesian coordinate format optimized in n-pentadecane at IEF-PCM DFT level.

|   |          |          |          |
|---|----------|----------|----------|
| C | -1.73970 | 3.53987  | 0.42540  |
| H | -2.27934 | 4.17302  | 1.14046  |
| C | -0.40395 | 3.64168  | 0.40660  |
| H | 0.05105  | 4.35305  | 1.10675  |
| C | 0.57115  | 2.89479  | -0.45055 |
| H | 1.07122  | 3.61131  | -1.12769 |
| H | 0.05108  | 2.17770  | -1.10359 |
| C | 1.64686  | 2.16492  | 0.35707  |
| H | 2.17536  | 2.89200  | 0.99807  |
| H | 1.16107  | 1.45622  | 1.04911  |
| C | 2.65942  | 1.42246  | -0.50642 |
| H | 3.11551  | 2.13028  | -1.22130 |
| H | 2.13057  | 0.67657  | -1.12599 |
| C | 3.76190  | 0.72920  | 0.28552  |
| H | 3.30798  | 0.03874  | 1.01802  |
| H | 4.30474  | 1.48040  | 0.88604  |
| C | 4.75845  | -0.03880 | -0.57577 |
| H | 5.18820  | 0.64657  | -1.32906 |
| H | 4.21667  | -0.80809 | -1.15577 |
| C | 5.88609  | -0.69724 | 0.21099  |
| H | 5.47447  | -1.37744 | 0.97384  |
| H | 6.43181  | 0.06971  | 0.78625  |
| C | 6.87655  | -1.47362 | -0.63898 |
| H | 7.34845  | -0.81831 | -1.39154 |
| H | 6.35053  | -2.24928 | -1.22542 |
| C | 8.02061  | -2.19359 | 0.14343  |
| O | 7.91957  | -2.20983 | 1.38838  |
| O | 8.91203  | -2.69254 | -0.57271 |
| C | -2.61016 | 2.65273  | -0.41142 |
| H | -2.00612 | 2.07142  | -1.12410 |
| H | -3.27668 | 3.28522  | -1.02591 |
| C | -3.47614 | 1.70141  | 0.41703  |
| H | -2.82066 | 1.05226  | 1.02161  |
| H | -4.06929 | 2.28554  | 1.14228  |
| C | -4.41088 | 0.84244  | -0.42574 |
| H | -3.81582 | 0.26424  | -1.15408 |
| H | -5.06292 | 1.49840  | -1.02925 |
| C | -5.27356 | -0.11368 | 0.38904  |
| H | -5.86760 | 0.46323  | 1.11960  |
| H | -4.62076 | -0.77072 | 0.98969  |
| C | -6.20901 | -0.97011 | -0.45618 |
| H | -6.86211 | -0.31243 | -1.05659 |
| H | -5.61417 | -1.54506 | -1.18738 |
| C | -7.07116 | -1.92962 | 0.35502  |
| H | -7.66558 | -1.35570 | 1.08790  |
| H | -6.41837 | -2.58874 | 0.95386  |
| C | -8.00731 | -2.78476 | -0.49150 |
| H | -8.65816 | -2.12437 | -1.08988 |
| H | -7.41141 | -3.35619 | -1.22348 |
| C | -8.86470 | -3.74153 | 0.32408  |
| H | -9.50041 | -3.19813 | 1.04013  |

|   |          |          |          |
|---|----------|----------|----------|
| H | -9.52633 | -4.34129 | -0.31774 |
|   | -8.24263 | -4.44055 | 0.90398  |

**Table S14.** Geometry of the oleic acid-L-Arg adduct in the orthogonal Cartesian coordinate format optimized in the gas phase at DFT level.

|   |           |          |          |
|---|-----------|----------|----------|
| C | -10.49735 | 1.39060  | -0.24579 |
| C | -12.91637 | 0.62339  | 0.19400  |
| C | -12.90609 | 0.66389  | 0.09422  |
| C | -9.81079  | 0.35978  | 0.63257  |
| C | -8.41005  | 0.01561  | 0.15548  |
| C | -7.78193  | -0.94417 | 0.03146  |
| C | -6.45835  | -2.25868 | 0.00779  |
| C | -5.93556  | -0.65387 | 0.86690  |
| C | -5.79362  | -2.16934 | 0.84528  |
| C | -12.43623 | 3.97422  | -0.56472 |
| C | -11.73167 | 2.89626  | -0.86780 |
| C | -13.73657 | 2.92117  | -0.80414 |
| C | -11.88771 | 2.05651  | -1.24980 |
| C | -10.98756 | 2.03600  | -1.29180 |
| C | -9.92712  | 0.22863  | -0.26401 |
| C | -9.74812  | 0.73339  | 0.67300  |
| C | -10.41681 | -0.56321 | 0.67321  |
| C | -8.45911  | -0.33306 | -0.88741 |
| C | -8.28011  | -0.03384 | 0.14143  |
| C | -6.98871  | -3.60009 | 2.50825  |
| C | -6.80043  | -2.43322 | 2.38826  |
| C | -12.72284 | -2.43142 | 1.83935  |
| C | -14.95376 | 0.06192  | -0.70373 |
| C | -14.00616 | 2.08718  | -0.92436 |
| C | -4.53656  | 2.27805  | -0.47600 |
| C | -6.45399  | -0.88747 | -0.19588 |
| C | -3.12499  | -0.08747 | -0.51621 |
| C | -3.49799  | -1.19981 | -0.25628 |
| C | -2.75033  | -2.75350 | 0.83393  |
| C | -1.65933  | -2.74198 | 0.85551  |
| C | -0.90903  | -3.43737 | 0.98327  |
| C | -0.41903  | -3.53846 | 1.04461  |
| C | -0.57133  | -1.80001 | -0.00332 |
| C | -0.99254  | -0.70944 | 0.23392  |
| C | -1.00649  | -2.11943 | -0.66182 |
| C | -1.08026  | -3.22783 | -0.92478 |
| C | -1.42803  | -1.76333 | 0.00684  |
| C | -1.41302  | -1.50050 | -0.93972 |
| C | -1.54147  | -0.83709 | -0.97148 |
| C | -3.77099  | -0.40576 | -0.89771 |
| C | -3.39633  | -3.81656 | -0.88762 |
| C | -2.74163  | -1.41705 | -0.88762 |
| C | -4.35044  | -1.20016 | -0.99399 |
| C | -4.38793  | -1.55473 | -2.96333 |
| C | -7.10914  | -0.10607 | -1.99337 |
| C | -6.63889  | -2.51035 | -1.88899 |
| C | -1.60644  | -1.60735 | -1.88899 |
| C | -1.10446  | -0.33431 | -0.88762 |
| C | -0.90911  | -0.96527 | -2.68526 |
| C | -6.29012  | -1.36974 | -3.99544 |
| C | -8.06742  | -0.04323 | -2.95258 |
| C | -7.06742  | 0.66740  | -1.75310 |
| C | -7.30660  | 0.38703  | -0.88762 |
| C | -5.58660  | 0.40475  | -1.52774 |
| C | -10.71568 | -0.65728 | -2.44641 |
| C | -9.71327  | -0.67647 | -1.37356 |
| C | -9.91427  | 2.77649  | -0.35308 |
| C | -9.38792  | 0.95023  | -0.51443 |
| C | -11.62582 | 0.95117  | -0.30416 |
| C | -11.78349 | -0.91816 | -0.11973 |
| C | -12.18772 | -0.16197 | 0.04581  |
| C | -12.21250 | 1.16214  | -1.03387 |
| C | -12.68482 | 1.99792  | -1.05089 |
| C | -13.05465 | 2.42626  | -0.86888 |
| C | -13.69465 | 2.43484  | 0.88888  |
| C | -13.85057 | 0.33496  | 1.28873  |
| C | -14.25957 | 2.67376  | 0.36900  |
| C | -13.78214 | 2.97192  | 2.45628  |
| C | -12.17474 | 1.98042  | 3.35373  |
| C | -14.17157 | 3.28640  | 3.38308  |
| C | -15.76135 | 1.94797  | 2.68977  |
| C | -16.15094 | 2.52920  | 3.53799  |
| C | -16.94516 | 0.88411  | 2.90490  |
| C | -7.99221  | 0.22798  | -3.90423 |
